# Supplementary material for: Optical Properties Investigation of Upconverting K2Gd(PO4)(WO4):20%Yb3+,Tm3+ Phosphors
Source: MDPI journal article supplement (doi:10.3390/ma16031305), 2023-02-03
Supplement: s1 [file s1]

Supplementary Materials

# Optical properties investigation of upconverting $\text{K}_2\text{Gd}(\text{PO}_4)(\text{WO}_4):20\%\text{Yb}^{3+},\text{Tm}^{3+}$ phosphors

Julija Grigorjevaite \* and Arturas Katelnikovas \*

Institute of Chemistry, Faculty of Chemistry and Geosciences, Vilnius University, Naugarduko 24, LT-03225 Vilnius, Lithuania

\* Correspondence: julija.grigorjevaite@chf.vu.lt (J.G.); arturas.katelnikovas@chf.vu.lt (A.K.)

**Table S1.** Spectrometer settings for measuring reflection spectra of  $\text{KGPW}:20\%\text{Yb}^{3+},\text{Tm}^{3+}$  phosphors.

| $\text{KGPW}:20\%\text{Yb}^{3+},\text{Tm}^{3+}$ |              |
|-------------------------------------------------|--------------|
| Parameter                                       |              |
| EmBW                                            | 0.15 nm      |
| ExBW                                            | 4.00 nm      |
| Step                                            | 0.50 nm      |
| Integration time                                | 0.200 s      |
| Range                                           | 250 – 800 nm |
| Repeats                                         | 3            |

**Citation:** Grigorjevaite, J.; Katelnikovas, A. Optical Properties Investigation of Upconverting  $\text{K}_2\text{Gd}(\text{PO}_4)(\text{WO}_4):20\%\text{Yb}^{3+},\text{Tm}^{3+}$  Phosphors. *Materials* **2023**, *16*, 1305. <https://doi.org/10.3390/ma16031305>

Academic Editor: Yuta Matsushima

Received: 23 December 2022

Revised: 22 January 2023

Accepted: 1 February 2023

Published: 3 February 2023

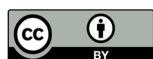

**Copyright:** © 2023 by the authors. Submitted for possible open access publication under the terms and conditions of the Creative Commons Attribution (CC BY) license (<https://creativecommons.org/licenses/by/4.0/>).

**Table S2.** Spectrometer settings for measuring excitation spectra of KGPW:20%Yb<sup>3+</sup>,Tm<sup>3+</sup> phosphors.

| KGPW:20%Yb <sup>3+</sup> ,Tm <sup>3+</sup> |           |         |
|--------------------------------------------|-----------|---------|
| Excitation scan                            | Parameter |         |
| $\lambda_{\text{em}} = 450 \text{ nm}$     | EmBW      | 1.60 nm |
|                                            | ExBW      | 0.50 nm |
|                                            | Dwell     | 0.200 s |
|                                            | Step      | 0.50 nm |

**Table S3.** Spectrometer settings for measuring DC emission spectra of KGPW:20%Yb<sup>3+</sup>,Tm<sup>3+</sup> phosphors.

| KGPW:20%Yb <sup>3+</sup> ,Tm <sup>3+</sup> |           |         |
|--------------------------------------------|-----------|---------|
| Emission scan                              | Parameter |         |
| $\lambda_{\text{ex}} = 360 \text{ nm}$     | EmBW      | 0.50 nm |
|                                            | ExBW      | 1.60 nm |
|                                            | Dwell     | 0.200 s |
|                                            | Step      | 0.50 nm |

**Table S4.** Spectrometer settings for measuring UC emission spectra of KGPW:20%Yb<sup>3+</sup>,Tm<sup>3+</sup> phosphors.

| KGPW:20%Yb <sup>3+</sup> ,Tm <sup>3+</sup> |           |         |
|--------------------------------------------|-----------|---------|
| Emission scan                              | Parameter |         |
| $\lambda_{\text{ex}} = 980 \text{ nm}$     | EmBW      | 0.06 nm |
|                                            | ExBW      | N/A     |
|                                            | Dwell     | 0.200 s |
|                                            | Step      | 0.50 nm |

**Table S5.** Lattice parameters of KGPW, KGPW:5%Tm<sup>3+</sup>, KGPW:20%Yb<sup>3+</sup>, and KGPW:20%Yb<sup>3+</sup>,5%Ho<sup>3+</sup> samples derived from Rietveld refinement analysis.

| Sample                                                                                            | <i>a</i> , Å | <i>b</i> , Å | <i>c</i> , Å | <i>V</i> , Å <sup>3</sup> | Ref.      |
|---------------------------------------------------------------------------------------------------|--------------|--------------|--------------|---------------------------|-----------|
| K <sub>2</sub> Ho(PO <sub>4</sub> )(WO <sub>4</sub> )                                             | 6.8820       | 12.1485      | 19.6950      | 1646.6                    | [1]       |
| K <sub>2</sub> Gd(PO <sub>4</sub> )(WO <sub>4</sub> )                                             | 6.94294      | 12.24594     | 19.68550     | 1673.7                    | This work |
| K <sub>2</sub> Gd(PO <sub>4</sub> )(WO <sub>4</sub> ):5%Tm <sup>3+</sup>                          | 6.94232      | 12.24028     | 19.69242     | 1673.4                    | This work |
| K <sub>2</sub> Gd(PO <sub>4</sub> )(WO <sub>4</sub> ):20%Yb <sup>3+</sup>                         | 6.92142      | 12.20985     | 19.67467     | 1662.7                    | This work |
| K <sub>2</sub> Gd(PO <sub>4</sub> )(WO <sub>4</sub> ):20%Yb <sup>3+</sup> ,<br>5%Tm <sup>3+</sup> | 6.92048      | 12.20600     | 19.67702     | 1662.1                    | This work |

**Table S6.** Color coordinates (CIE 1931 color space) of KGPW:Tm<sup>3+</sup> and KGPW:20%Yb<sup>3+</sup>,Tm<sup>3+</sup> as a function of Tm<sup>3+</sup> concentration and excitation wavelength.

| Tm <sup>3+</sup><br>(%) | KGPW:Tm <sup>3+</sup>                  |         | KGPW:20%Yb <sup>3+</sup> ,Tm <sup>3+</sup> |         |                                        |         |
|-------------------------|----------------------------------------|---------|--------------------------------------------|---------|----------------------------------------|---------|
|                         | $\lambda_{\text{ex}} = 360 \text{ nm}$ |         | $\lambda_{\text{ex}} = 360 \text{ nm}$     |         | $\lambda_{\text{ex}} = 980 \text{ nm}$ |         |
|                         | x                                      | y       | x                                          | y       | x                                      | y       |
| 0.5                     | 0.15762                                | 0.02803 | 0.15797                                    | 0.03672 | 0.14463                                | 0.09657 |
| 1                       | 0.15763                                | 0.02889 | 0.15772                                    | 0.02931 | 0.16312                                | 0.10567 |
| 2                       | 0.15772                                | 0.02840 | 0.15738                                    | 0.02821 | 0.14411                                | 0.09332 |
| 5                       | 0.15735                                | 0.02924 | 0.15709                                    | 0.02718 | 0.14628                                | 0.09301 |

**Table S7.** UC PL rise time and lifetime values of KGPW:Tm<sup>3+</sup> and KGPW:20%Yb<sup>3+</sup>,Tm<sup>3+</sup> phosphors as a function of Tm<sup>3+</sup> concentration, emission wavelength, and excitation wavelength.

|                      | Rise time (μs)                                                 | Std. dev. (μs) | Lifetime $\tau_{eff}$ (μs) | Std. dev. (μs) |
|----------------------|----------------------------------------------------------------|----------------|----------------------------|----------------|
| Tm <sup>3+</sup> (%) | $\lambda_{ex} = 360 \text{ nm } \lambda_{em} = 450 \text{ nm}$ |                |                            |                |
|                      | KGPW:Tm <sup>3+</sup>                                          |                |                            |                |
| 0.5                  | -                                                              | -              | 24                         | 1              |
| 1                    | -                                                              | -              | 34                         | 1              |
| 2                    | -                                                              | -              | 23                         | 1              |
| 5                    | -                                                              | -              | 20                         | 1              |
| Tm <sup>3+</sup> (%) | $\lambda_{ex} = 360 \text{ nm } \lambda_{em} = 450 \text{ nm}$ |                |                            |                |
|                      | KGPW:20%Yb <sup>3+</sup> ,Tm <sup>3+</sup>                     |                |                            |                |
| 0.5                  | -                                                              | -              | 22                         | 1              |
| 1                    | -                                                              | -              | 22                         | 1              |
| 2                    | -                                                              | -              | 21                         | 1              |
| 5                    | -                                                              | -              | 19                         | 1              |
| Tm <sup>3+</sup> (%) | $\lambda_{ex} = 980 \text{ nm } \lambda_{em} = 478 \text{ nm}$ |                |                            |                |
|                      | KGPW:20%Yb <sup>3+</sup> ,Tm <sup>3+</sup>                     |                |                            |                |
| 0.5                  | 73                                                             | 8              | 201                        | 5              |
| 1                    | 68                                                             | 8              | 159                        | 2              |
| 2                    | 63                                                             | 7              | 138                        | 2              |
| 5                    | 38                                                             | 3              | 107                        | 1              |
| Tm <sup>3+</sup> (%) | $\lambda_{ex} = 980 \text{ nm } \lambda_{em} = 800 \text{ nm}$ |                |                            |                |
|                      | KGPW:20%Yb <sup>3+</sup> ,Tm <sup>3+</sup>                     |                |                            |                |
| 0.5                  | 36                                                             | 2              | 267                        | 3              |
| 1                    | 52                                                             | 6              | 204                        | 3              |
| 2                    | 56                                                             | 7              | 158                        | 2              |
| 5                    | 39                                                             | 2              | 101                        | 1              |

**Table S8.** The calculated PL lifetime values ( $\lambda_{ex} = 980 \text{ nm}$ ,  $\lambda_{em} = 1050 \text{ nm}$ ) of Yb<sup>3+</sup> emission in KGPW:20%Yb<sup>3+</sup>,Tm<sup>3+</sup>, and Yb<sup>3+</sup> → Tm<sup>3+</sup> energy transfer efficiency ( $\eta_{tr}$ ) as a function of Tm<sup>3+</sup> concentration.

|                      | Lifetime $\tau_{eff}$ (μs)                 | Std. dev. (μs) | $\eta_{tr}$ (%) |
|----------------------|--------------------------------------------|----------------|-----------------|
| Tm <sup>3+</sup> (%) | KGPW:20%Yb <sup>3+</sup> ,Tm <sup>3+</sup> |                |                 |
| 0                    | 1312                                       | 24             | -               |
| 0.5                  | 738                                        | 5              | 44              |
| 1                    | 544                                        | 4              | 59              |
| 2                    | 457                                        | 4              | 65              |
| 5                    | 416                                        | 4              | 68              |

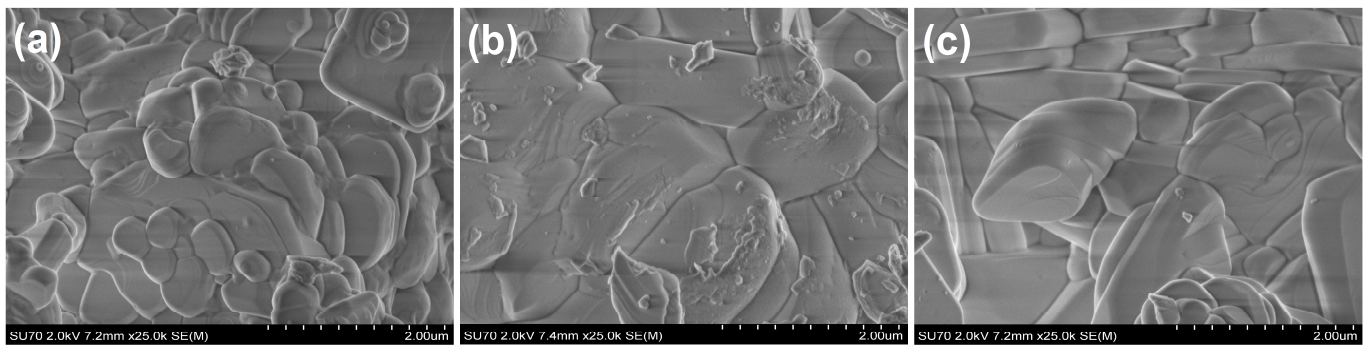

Figure S1. SEM images of (a) KGPW:5%Yb<sup>3+</sup>, (b) KGPW:20%Yb<sup>3+</sup>, and (c) KGPW:20%Yb<sup>3+</sup>,5%Tm<sup>3+</sup>.

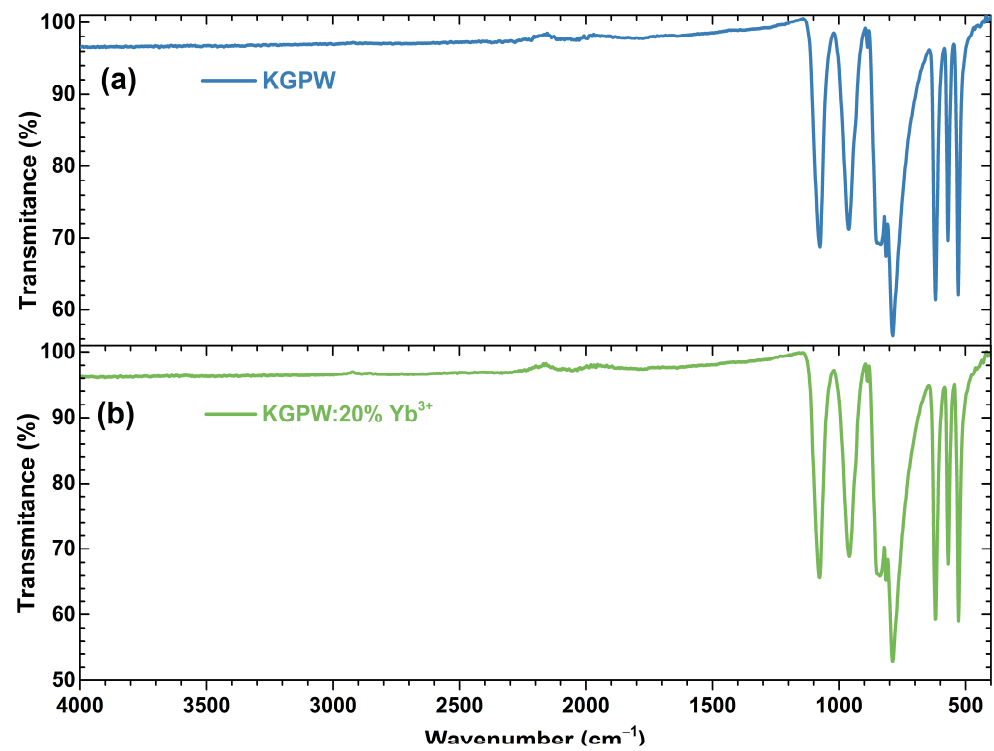

Figure S2. IR spectra of (a) undoped KGPW and (b) KGPW:20%Yb<sup>3+</sup>.



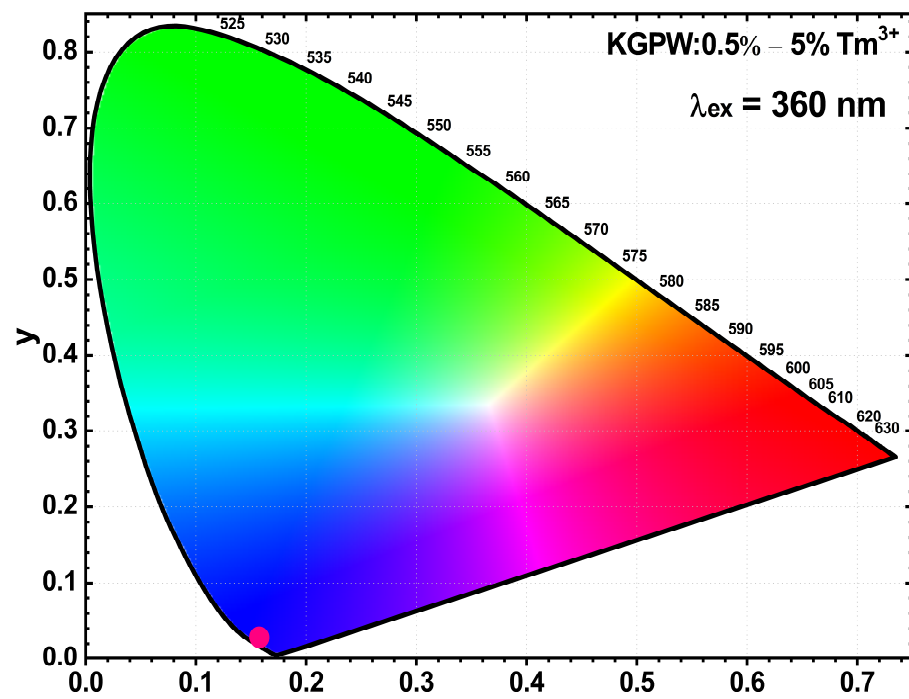

**Figure S3.** CIE 1931 color space diagram and color coordinates of KGPW: $\text{Tm}^{3+}$  as a function of  $\text{Tm}^{3+}$  concentration under 360 nm excitation.
